# Supplementary material for: Assessing Resource Efficiency of City Neighbourhoods: A Methodological Framework for Structuring and Practical Application of Indicators in Urban Planning
Source: MDPI journal article supplement (doi:10.3390/su14137951), 2022-06-29
Supplement: s1 [file s1]

Archive with 1 entries (1 files):
- sustainability-1737822-supplementary.pdf
